# Supplementary material
Source: PubMed Central journal article supplement (PMC6803328)
Supplement: IAI.00376-19-s0001.pdf [file IAI.00376-19-s0001.pdf]

|                         | Spleen cell number |          |
|-------------------------|--------------------|----------|
|                         | 7 DPV              | 14 DPV   |
| naïve                   | 4.80E+07           |          |
| Alhydrogel®<br>adjuvant | 4.80E+07           | 2.38E+07 |
|                         | 4.00E+07           | 2.63E+07 |
|                         | 5.20E+07           | 5.63E+07 |
|                         | 5.10E+07           | 5.75E+07 |
| PIV                     | 3.75E+07           | 6.00E+07 |
|                         | 6.38E+07           | 6.94E+07 |
|                         | 2.06E+07           | 5.63E+07 |
|                         | 6.75E+07           | 6.19E+07 |
|                         | 4.88E+07           | 7.31E+07 |
|                         | 7.88E+07           | 7.13E+07 |
| PIIV                    | 4.10E+07           | 4.13E+07 |
|                         | 6.00E+07           | 6.75E+07 |
|                         | 2.60E+07           | 4.63E+07 |
|                         | 5.90E+07           | 5.75E+07 |

*Supplemental Table 1.* Total spleen cells were counted by hemocytometer following isolation.
